# Supplementary material for: Satellitome Analysis of the Pacific Oyster Crassostrea gigas Reveals New Pattern of Satellite DNA Organization, Highly Scattered across the Genome
Source: MDPI journal article supplement (doi:10.3390/ijms22136798), 2021-06-24
Supplement: s1 [file s1]

**Satellitome Analysis of the Pacific oyster *Crassostrea gigas*  
reveals new pattern of satellite DNA organization,  
highly scattered across the genome**

Monika Tunjić-Cvitanić, Juan J. Pasantes, Daniel García-Souto, Tonči Cvitanić,  
Miroslav Plohl, Eva Šatović-Vukšić

**Supplementary Materials**

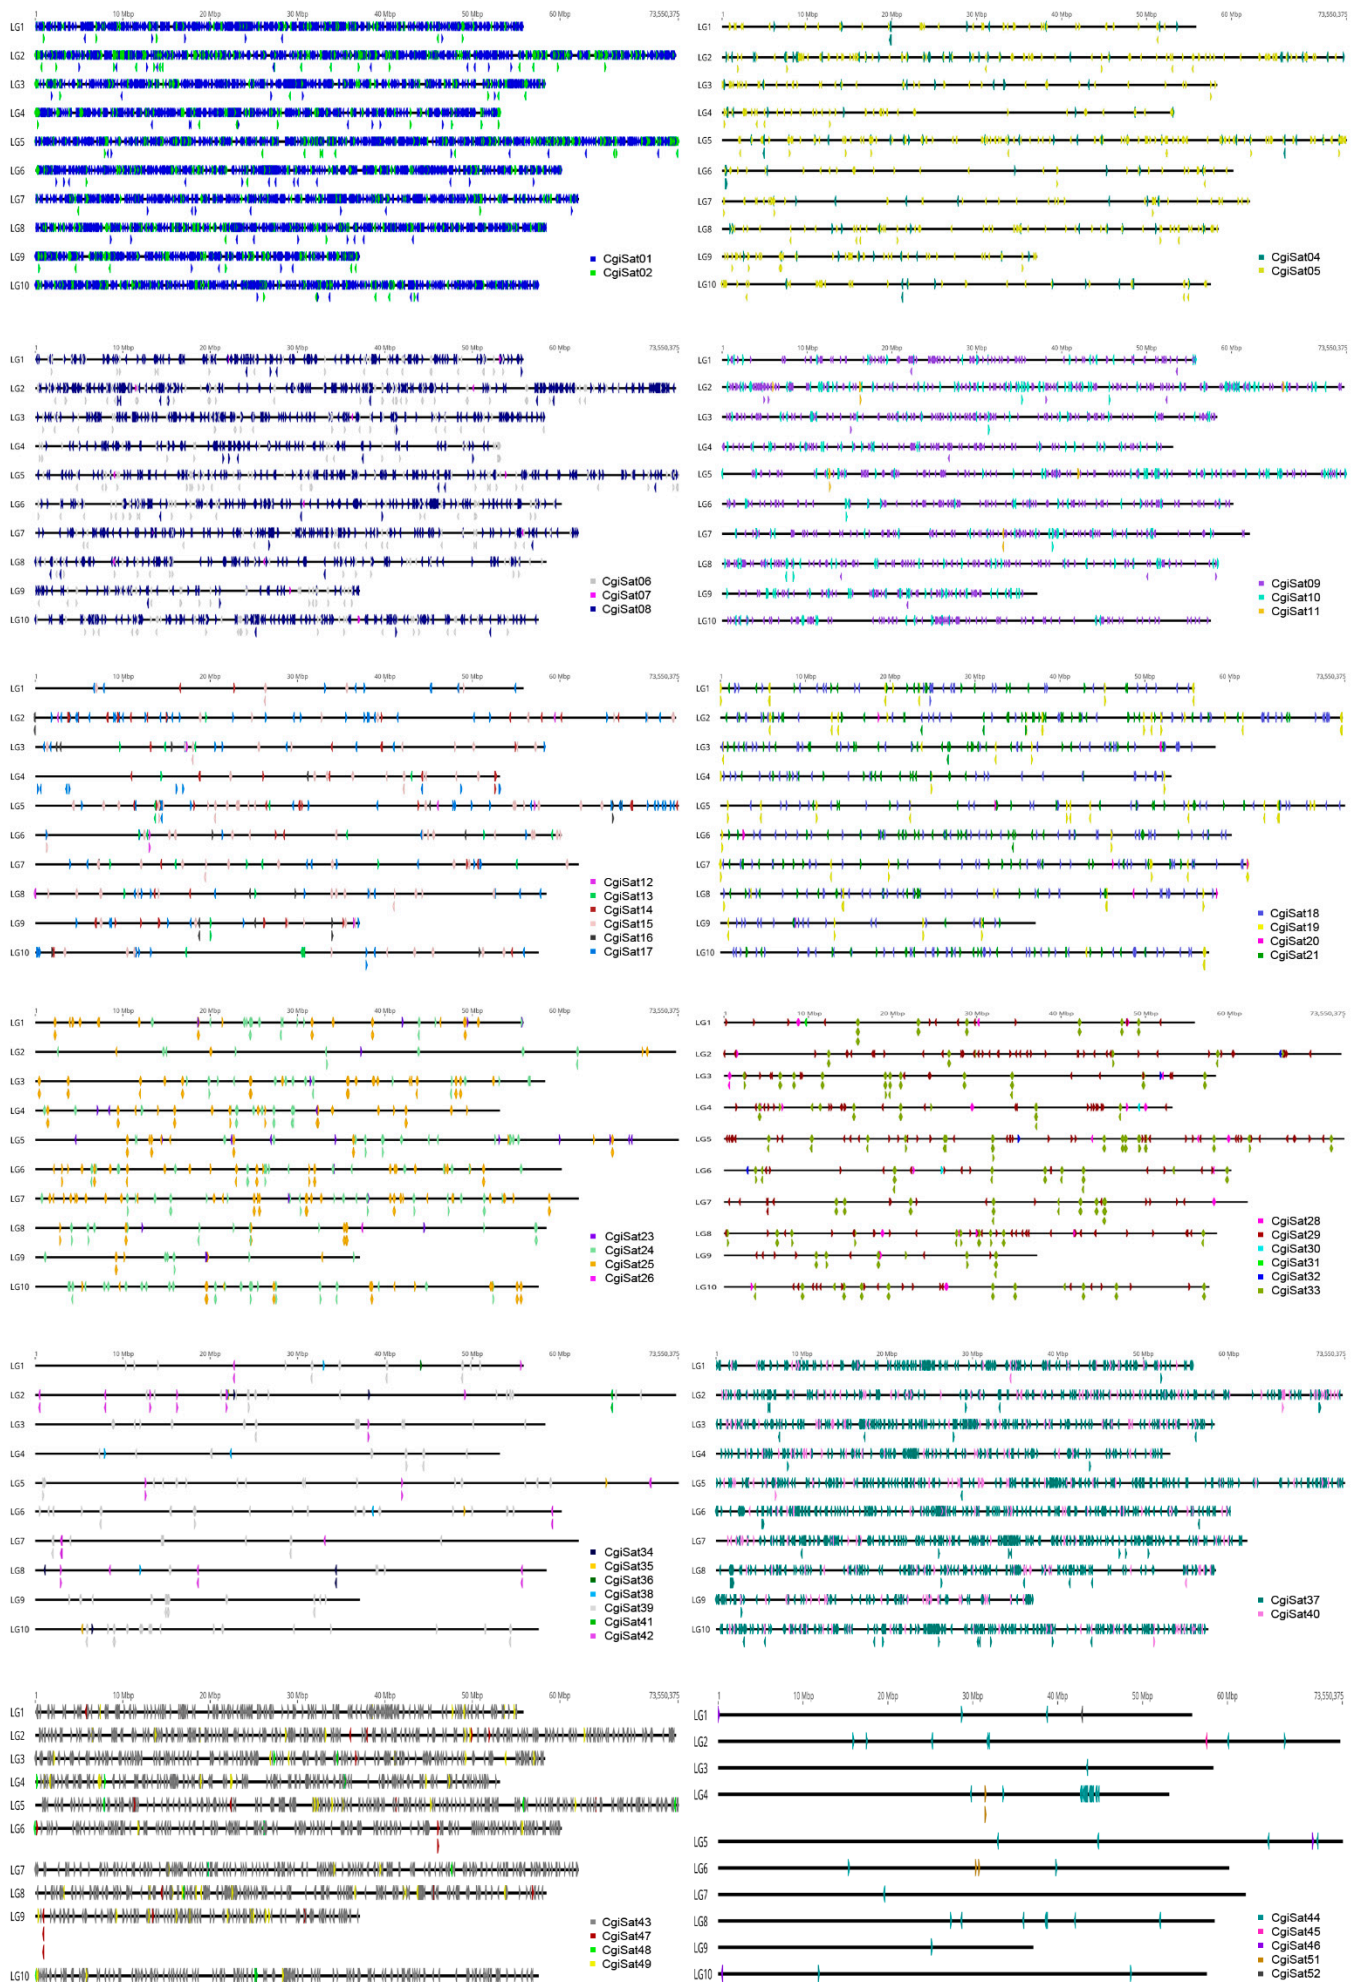

**Figure S1.** *In silico* localization of all RepeatExplorer2-detected satDNAs of *C. gigas* (except CgiSat03, CgiSat27, and CgiSat22 presented in Figure 2), annotated on the chromosomes of the *C. gigas* representative genome assembly GCA\_902806645.1. Some satDNA monomers are automatically placed below the black bar representing the chromosome due to the inability of the software to mark on the chromosome all the repeats that are in close proximity to each other.

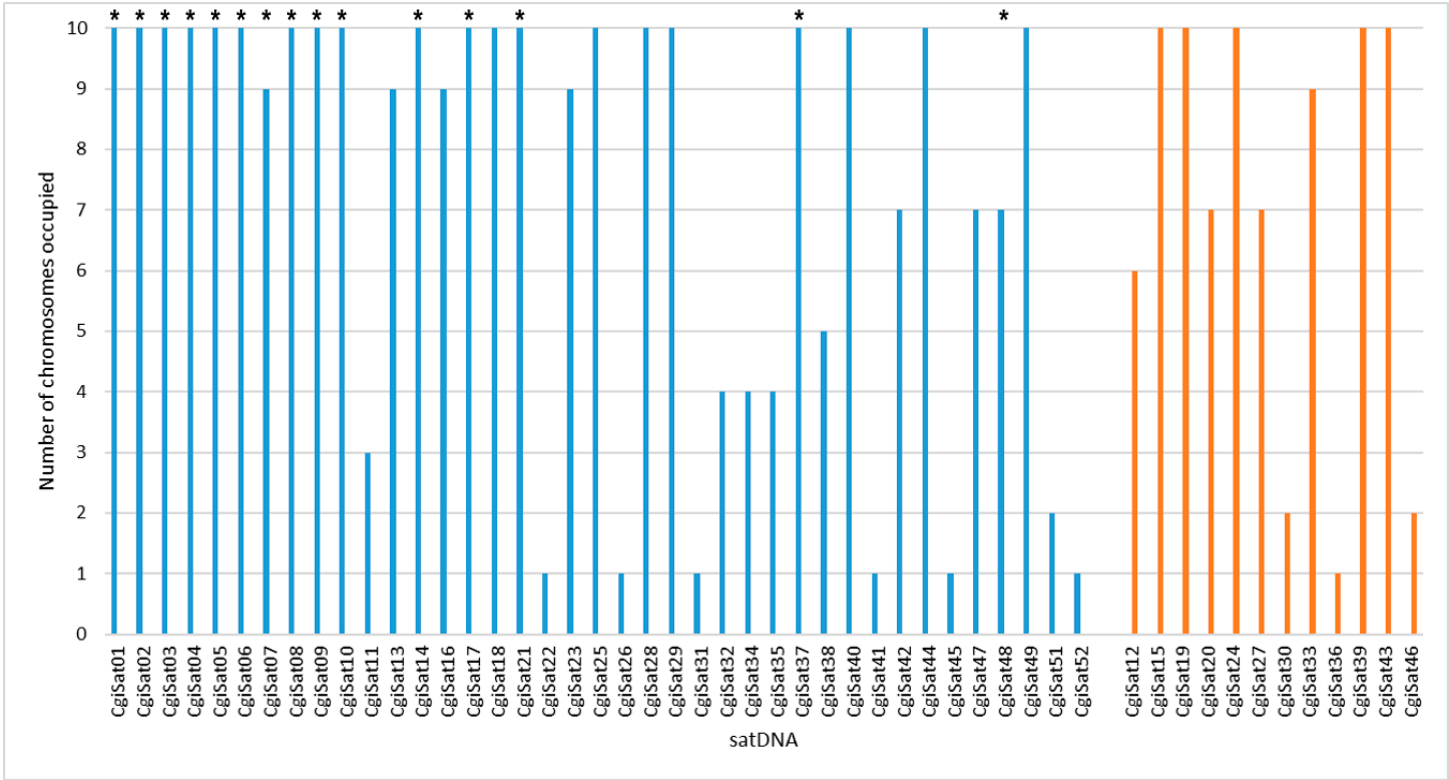

**Figure S2.** Chromosomal distribution of the 52 satDNAs composing the satellitome of *C. gigas*. Number of chromosomes of the representative genome assembly GCA\_902806645.1 in which satDNAs related (blue) and unrelated (orange) to mobile elements appear. Asterisks denote satDNAs showing similarity to Helitron mobile elements.

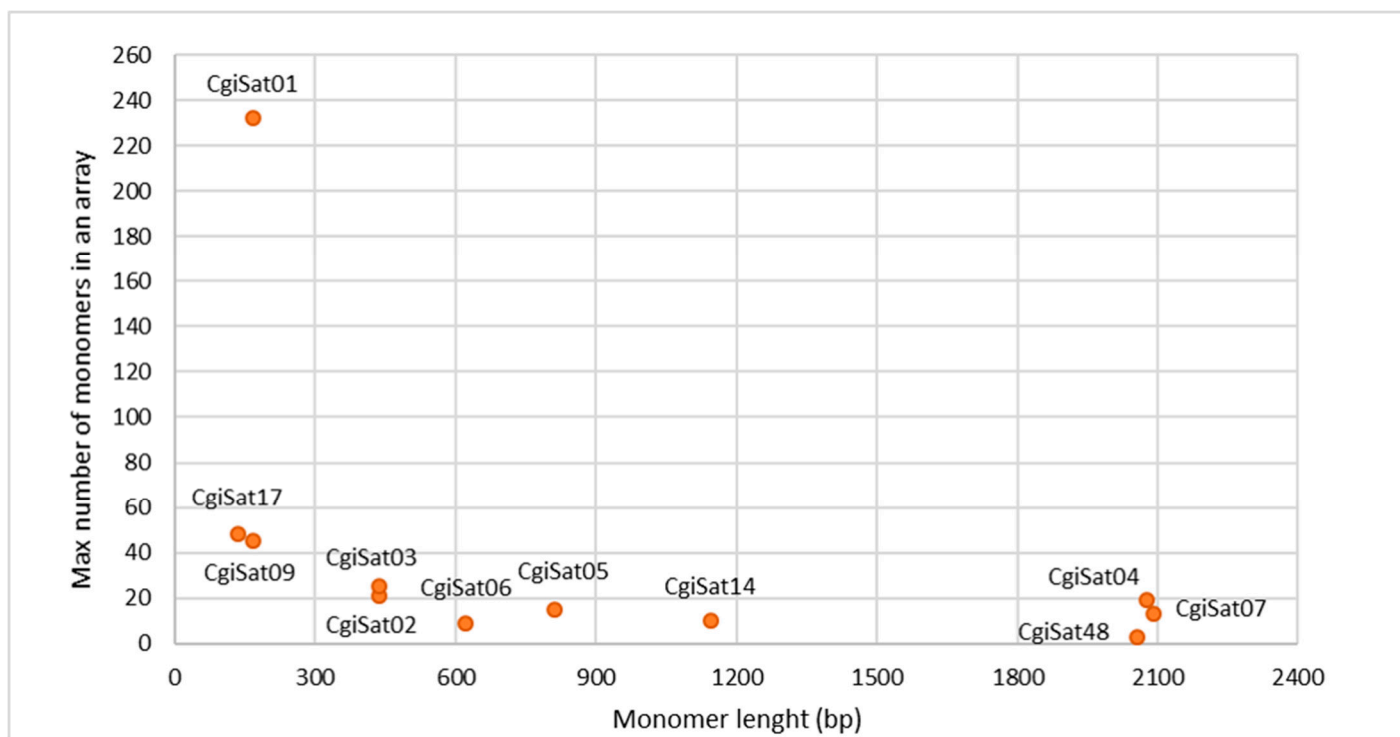

**Figure S3.** Relation between the maximum number of monomers detected in an array and the monomer size for eleven *C. gigas* satDNAs.

**Table S1.** Outputs of the four rounds of RepeatExplorer2 clustering performed on subsampled sets of reads.

|                  | Clustering 1                                  |                    | Clustering 2                                 |                    | Clustering 3                                 |                    | Clustering 4                                 |                    |
|------------------|-----------------------------------------------|--------------------|----------------------------------------------|--------------------|----------------------------------------------|--------------------|----------------------------------------------|--------------------|
|                  | 1 779 522 reads,<br>0.35 x genome<br>coverage | % of the<br>genome | 1 000 000 reads,<br>0.2 x genome<br>coverage | % of the<br>genome | 2 000 000 reads,<br>0.4 x genome<br>coverage | % of the<br>genome | 1 000 000 reads,<br>0.2 x genome<br>coverage | % of the<br>genome |
| <b>satDNA</b>    |                                               |                    |                                              |                    |                                              |                    |                                              |                    |
| <b>CgiSat01a</b> | Cl1                                           | 0.76               | Cl1                                          | 0.79               | Cl1                                          | 0.79               | Cl2                                          | 0.52               |
| <b>CgiSat01b</b> | Cl2                                           | 0.57               | Cl2                                          | 0.57               | Cl2                                          | 0.58               | Cl1                                          | 0.57               |
| <b>CgiSat02</b>  | Cl4                                           | 0.40               | Cl3                                          | 0.46               | Cl3                                          | 0.48               | Cl4                                          | 0.41               |
| <b>CgiSat03</b>  | Cl5                                           | 0.38               | Cl4                                          | 0.39               | Cl7                                          | 0.39               | Cl9                                          | 0.36               |
| <b>CgiSat04</b>  | Cl8                                           | 0.36               | Cl9                                          | 0.32               | Cl10                                         | 0.33               | -                                            | -                  |
| <b>CgiSat05</b>  | Cl9                                           | 0.35               | Cl5                                          | 0.38               | Cl6                                          | 0.39               | Cl7                                          | 0.40               |
| <b>CgiSat06</b>  | Cl11                                          | 0.33               | Cl8                                          | 0.32               | Cl11                                         | 0.33               | Cl11                                         | 0.32               |
| <b>CgiSat07</b>  | Cl28                                          | 0.20               | Cl22                                         | 0.21               | Cl26                                         | 0.20               | Cl23                                         | 0.21               |
| <b>CgiSat08</b>  | Cl29                                          | 0.19               | Cl27                                         | 0.19               | Cl29                                         | 0.19               | Cl30                                         | 0.18               |
| <b>CgiSat09</b>  | Cl40                                          | 0.16               | Cl48                                         | 0.13               | Cl40                                         | 0.16               | Cl41                                         | 0.14               |
| <b>CgiSat10</b>  | Cl46                                          | 0.14               | -                                            | -                  | Cl44                                         | 0.15               | Cl40                                         | 0.14               |
| <b>CgiSat11</b>  | Cl48                                          | 0.14               | Cl43                                         | 0.14               | Cl48                                         | 0.14               | Cl39                                         | 0.14               |
| <b>CgiSat12</b>  | Cl59                                          | 0.12               | Cl61                                         | 0.10               | Cl63                                         | 0.12               | Cl56                                         | 0.11               |
| <b>CgiSat13</b>  | Cl60                                          | 0.11               | Cl59                                         | 0.11               | -                                            | -                  | -                                            | -                  |
| <b>CgiSat14</b>  | Cl61                                          | 0.11               | Cl58                                         | 0.11               | Cl70                                         | 0.11               | -                                            | -                  |
| <b>CgiSat15</b>  | Cl86                                          | 0.09               | Cl80                                         | 0.08               | Cl85                                         | 0.09               | Cl77                                         | 0.08               |
| <b>CgiSat16</b>  | Cl102                                         | 0.07               | Cl91                                         | 0.07               | Cl103                                        | 0.07               | Cl89                                         | 0.07               |
| <b>CgiSat17</b>  | Cl119                                         | 0.06               | Cl122                                        | 0.06               | Cl128                                        | 0.06               | -                                            | -                  |
| <b>CgiSat18</b>  | Cl129                                         | 0.06               | Cl121                                        | 0.06               | -                                            | -                  | Cl130                                        | 0.05               |
| <b>CgiSat19</b>  | Cl139                                         | 0.05               | Cl180                                        | 0.04               | Cl199                                        | 0.04               | Cl206                                        | 0.03               |
| <b>CgiSat20</b>  | Cl145                                         | 0.05               | Cl138                                        | 0.05               | Cl152                                        | 0.05               | Cl125                                        | 0.05               |
| <b>CgiSat21</b>  | Cl152                                         | 0.05               | Cl137                                        | 0.05               | Cl148                                        | 0.05               | Cl142                                        | 0.05               |
| <b>CgiSat22</b>  | Cl175                                         | 0.04               | Cl159                                        | 0.04               | Cl173                                        | 0.04               | Cl152                                        | 0.04               |
| <b>CgiSat23</b>  | Cl182                                         | 0.04               | Cl175                                        | 0.04               | -                                            | -                  | -                                            | -                  |
| <b>CgiSat24</b>  | Cl199                                         | 0.03               | Cl171                                        | 0.04               | Cl194                                        | 0.04               | Cl173                                        | 0.04               |
| <b>CgiSat25</b>  | Cl205                                         | 0.03               | -                                            | -                  | Cl211                                        | 0.03               | Cl204                                        | 0.03               |

|          |       |      |       |      |       |      |       |      |
|----------|-------|------|-------|------|-------|------|-------|------|
| CgiSat26 | CI269 | 0.02 | CI247 | 0.02 | CI293 | 0.02 | CI246 | 0.02 |
| CgiSat27 | CI296 | 0.02 | CI266 | 0.02 | CI316 | 0.02 | CI262 | 0.02 |
| CgiSat28 | CI298 | 0.02 | CI264 | 0.02 | CI301 | 0.02 | CI282 | 0.02 |
| CgiSat29 | CI308 | 0.02 | -     | -    | -     | -    | CI300 | 0.01 |
| CgiSat30 | CI326 | 0.01 | CI295 | 0.01 | CI332 | 0.01 | CI290 | 0.02 |
| CgiSat31 | CI343 | 0.01 | -     | -    | CI362 | 0.01 | CI344 | 0.01 |
| CgiSat32 | CI373 | 0.01 | -     | -    | CI365 | 0.01 | -     | -    |
| CgiSat33 | -     | -    | CI139 | 0.05 | CI147 | 0.05 | -     | -    |
| CgiSat34 | -     | -    | CI186 | 0.03 | CI187 | 0.04 | -     | -    |
| CgiSat35 | -     | -    | CI234 | 0.02 | CI274 | 0.02 | -     | -    |
| CgiSat36 | -     | -    | CI341 | 0.01 | CI390 | 0.01 | CI341 | 0.01 |
| CgiSat37 | CI110 | 0.34 | -     | -    | -     | -    | -     | -    |
| CgiSat38 | CI70  | 0.10 | -     | -    | -     | -    | -     | -    |
| CgiSat39 | CI142 | 0.05 | -     | -    | -     | -    | -     | -    |
| CgiSat40 | CI178 | 0.04 | -     | -    | -     | -    | -     | -    |
| CgiSat41 | CI312 | 0.02 | -     | -    | -     | -    | -     | -    |
| CgiSat42 | -     | -    | CI187 | 0.03 | -     | -    | -     | -    |
| CgiSat43 | -     | -    | CI342 | 0.01 | -     | -    | -     | -    |
| CgiSat44 | -     | -    | CI344 | 0.01 | -     | -    | -     | -    |
| CgiSat45 | -     | -    | -     | -    | CI93  | 0.08 | -     | -    |
| CgiSat46 | -     | -    | -     | -    | CI241 | 0.03 | -     | -    |
| CgiSat47 | -     | -    | -     | -    | CI282 | 0.02 | -     | -    |
| CgiSat48 | -     | -    | -     | -    | -     | -    | CI5   | 0.40 |
| CgiSat49 | -     | -    | -     | -    | -     | -    | CI172 | 0.04 |
| CgiSat50 | -     | -    | -     | -    | -     | -    | CI234 | 0.02 |
| CgiSat51 | -     | -    | -     | -    | -     | -    | CI319 | 0.01 |
| CgiSat52 | -     | -    | -     | -    | -     | -    | CI111 | 0.06 |

Cluster names and genomic abundance are provided for each satDNA cluster. Combining the data from the four analyses yielded a satellitome composed of 52 satDNAs.

**Table S2.** Helitron elements showing similarity to *C. gigas* satDNAs in the Repbase search.

| satDNA   | Repbase classification |
|----------|------------------------|
| CgiSat01 | Helitron-N2_Cgi        |
| CgiSat02 | Helitron-N40_CGi       |
| CgiSat03 | Helitron-N31_CGi       |
| CgiSat04 | Helitron-N3_CGi        |
| CgiSat05 | Helitron-N4_CGi        |
| CgiSat06 | Helitron-N32_CGi       |
| CgiSat07 | Helitron-N3_CGi        |
| CgiSat08 | Helitron-N25_CGi       |
| CgiSat09 | Helitron-N2C_Cgi       |
| CgiSat10 | Helitron-N62B_CGi      |
| CgiSat14 | Helitron-N28_CGi       |
| CgiSat17 | Helitron-N35_CGi       |
| CgiSat21 | Helitron-1_DEu         |
| CgiSat37 | Helitron-N12_CGi       |
| CgiSat48 | Helitron-N29_CGi       |

**Table S3.** Nucleotide sequences of the five Helitron conserved boxes.

| Box   | Nucleotide sequence                                                                                                                                                 |
|-------|---------------------------------------------------------------------------------------------------------------------------------------------------------------------|
| Box 1 | TAGCTCACCTGAGCCGAAGGCTCAAGTGAGCTTTTCTGATCACA                                                                                                                        |
| Box 2 | TGTTGCTCAGGTGAGCGATGTGGCCCATGGGCCTCTTGT                                                                                                                             |
| Box 3 | AAACTTTTCACATTTTCAACTTCTTCTCAAGAACCACTGGGCCAATTTCAACC<br>AAATTTGGCACAAAGCATCCTTAGGBDAAGGGGATTHAAATTTGTAAAATD<br>AAGGGCCACGCCCTTTTBAAAAGGGAGATAATTGVGAATTADTGAAAATTT |
| Box 4 | TAGGGTCTTCCGTTTTCCAACGGAAGACCCTATTGTTATTGTTCTGTTTCTTT                                                                                                               |
| Box 5 | ACGGAAGACCCACTCGTTGCTCGCAACGAGATCGTGTCTAGT                                                                                                                          |

**Table S4.** Positions of the satDNA sequences on the chromosomes or scaffolds, number of monomers in each extraction, and presence (1) or absence (0) of Helitron boxes in the 2000 bp flanking the satDNA sequence for eleven of satDNAs.

The table is provided as a separate **Table S4.xls** document containing 11 sheets.



**Table S5.** Primers and parameters used in PCR reactions for probe labelling.

| Primers used                                                                | Initial denaturation | Amplification (30 cycles)              | Final extension |
|-----------------------------------------------------------------------------|----------------------|----------------------------------------|-----------------|
| CgiSat02_F: TAGGGGTTTTTAGGGGCCAA<br>CgiSat02_R: TAGGGGCCGATCCCTTATCTC       | 94 °C/5 m            | 94 °C/30 s<br>56 °C/30 s<br>72 °C/30 s | 72 °C/ 7 m      |
| CgiSat03_F: CCTCTAGATCCTTAATGGGGACA<br>CgiSat03_R: GCTGGCCCCTAAAATATTCAATCA |                      | 94 °C/30 s<br>58 °C/30 s<br>72 °C/30 s |                 |
| CgiSat04_F: TGCAGCCATTTTGCTGTCTG<br>CgiSat04_R: CAGCTCGCCCTACATGTGAT        |                      | 94 °C/30 s<br>55 °C/30 s<br>72 °C/30 s |                 |
| CgiSat05_F: GGAAGTAAAGCTGGAAGTTCCTGTA<br>CgiSat05_R: TGTCACCTCCGGTCGAAACC   |                      | 94 °C/30 s<br>58 °C/30 s<br>72 °C/30 s |                 |
| CgiSat09_F: GTTAAACTTTGAACCCCGCCT<br>CgiSat09_R: CTCAAGAACCACTGCACCAGA      |                      | 94 °C/30 s<br>58 °C/30 s<br>72 °C/30 s |                 |
| CgiSat17_F: TCGTGTTTAAATGACCTCAGAC<br>CgiSat17_R: GCAGAATTGTAAGCGCAACTT     |                      | 94 °C/30 s<br>62 °C/30 s<br>72 °C/30 s |                 |
| CgiSat28_F: GTTTAGATCCCTACATAACAG<br>CgiSat28_R: TAGGACTTGTGCTCATTAGG       |                      | 94 °C/30 s<br>60 °C/30 s<br>72 °C/30 s |                 |
| CgiSat37_F: AGCATCCGAAACCTATGGCTC<br>CgiSat37_R: TTGCAGGTGCCCTCTGATGA       |                      | 94 °C/30 s<br>56 °C/30 s<br>72 °C/30 s |                 |
| CgiSat46_F: TTGTACAGAGGTAGGTCAC<br>CgiSat46_R: TTAAACTTCCGGGTTGGG           |                      | 94 °C/30 s<br>47 °C/30 s<br>72 °C/30 s |                 |
| 5S rDNA_F: GAAGTTAAGCAACGTAGAG<br>5S rDNA_R: TCAATCTTTCTATCTGTG             |                      | 94 °C/30 s<br>43 °C/30 s<br>72 °C/30 s |                 |

**Data S1.** Fasta files of the consensus sequences of the 52 satDNAs constituting the satellitome of *C. gigas*.

The file is provided as a separate document.
